# Supplementary material
Source: publisher figshare collection journal article supplement (https://gsajournals.figshare.com/ndownloader/files/23204435)
Supplement: Supplementary file 1 [file 23204435]

**Figure S2: Scatter plot of Pearson correlation between allele frequencies of pairs of SNP markers from a same scaffold and genomic distance between SNP markers in base pairs.**
